# Supplementary material
Source: PubMed Central journal article supplement (PMC3835749)

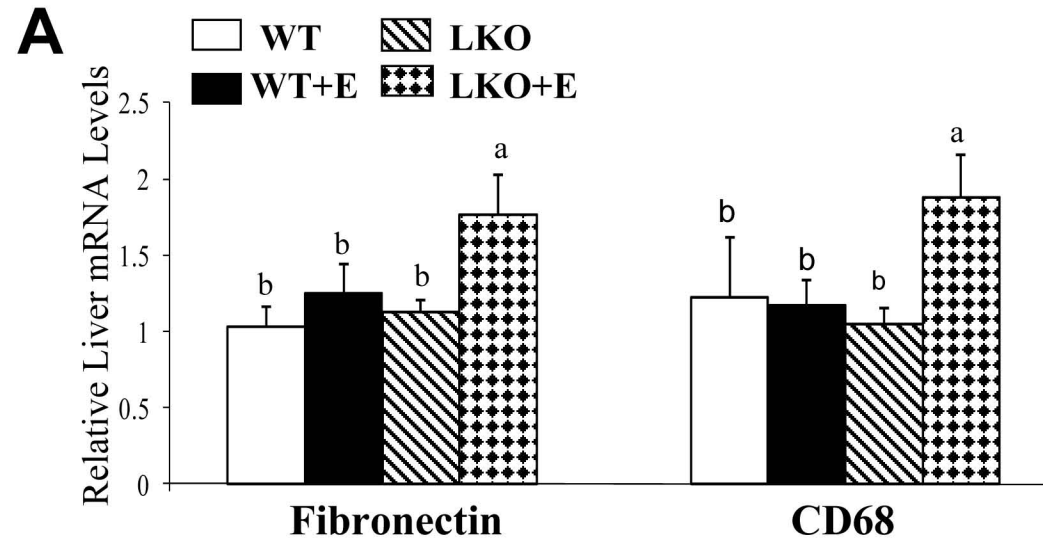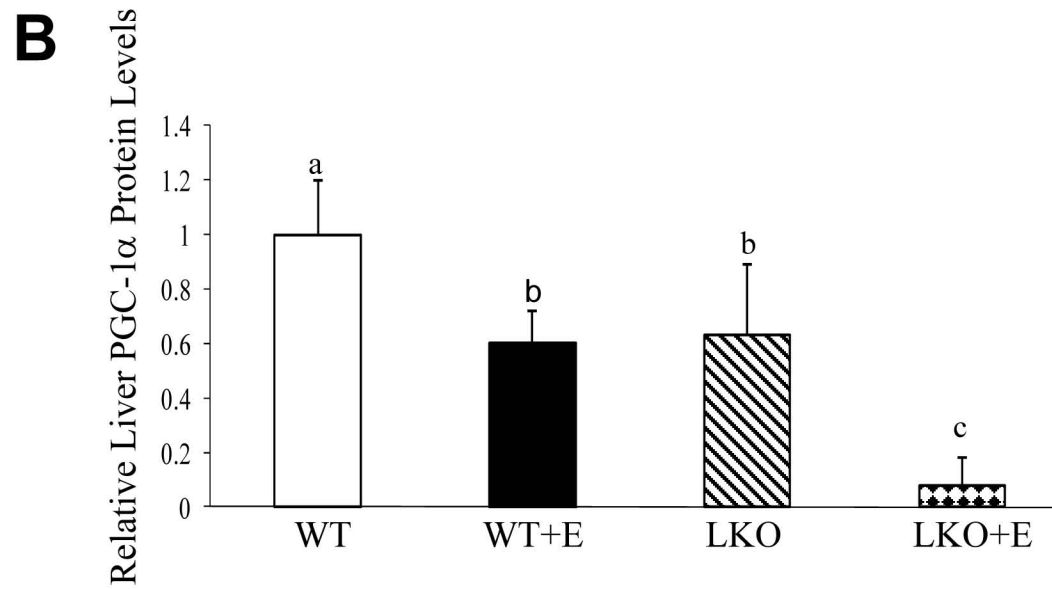

**Supporting Figure 1**

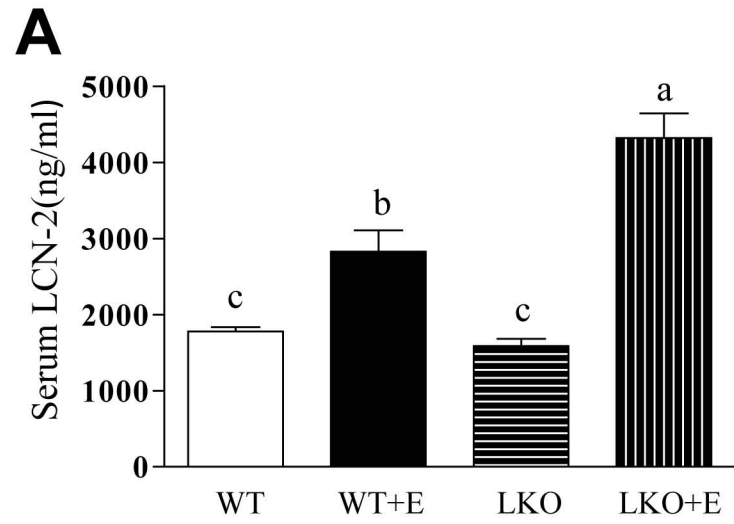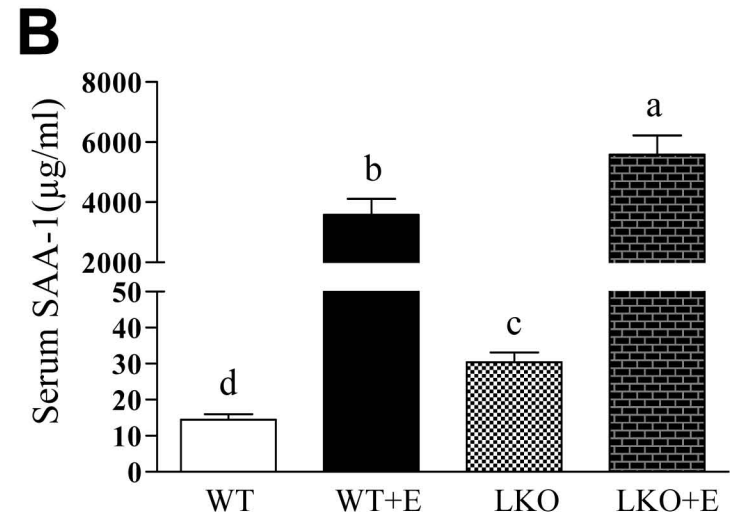

**Supporting Figure 2**

**A**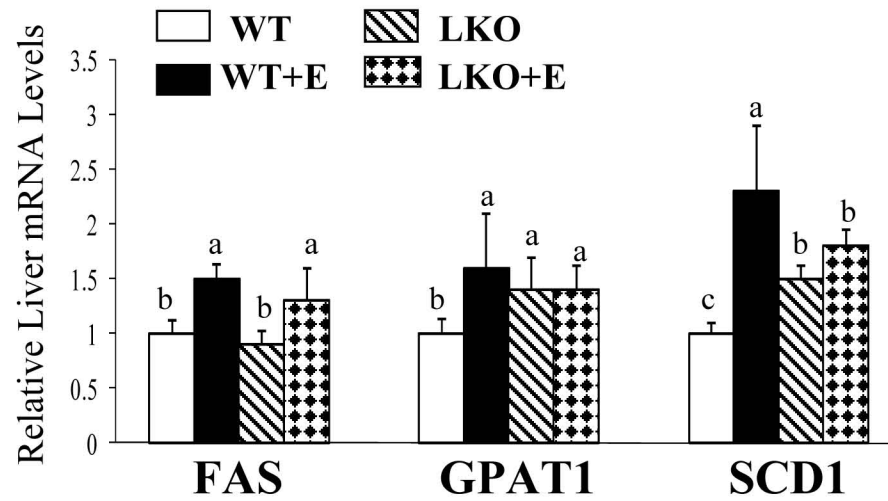**B**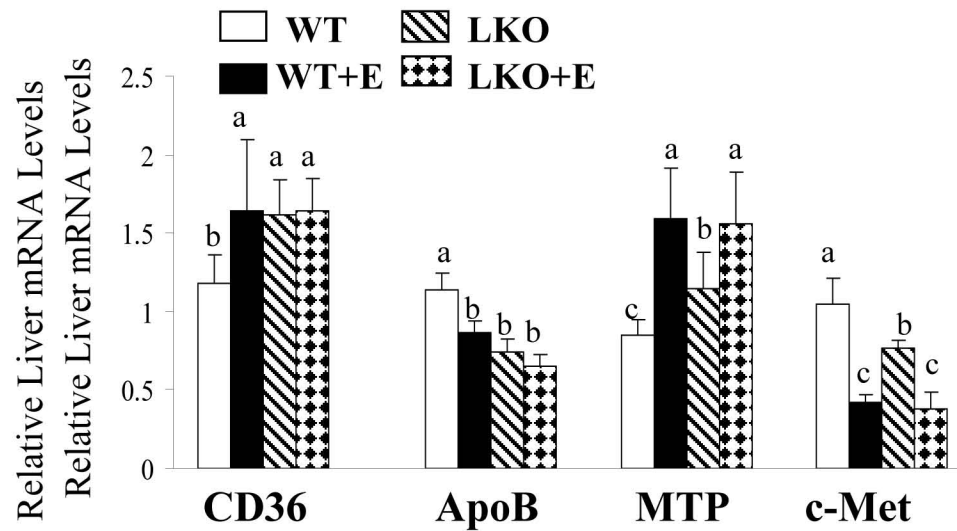**Supporting Figure 3**

Supplement: NIHMS496310-supplement-Supp_Figure_S1-S3.pdf [file NIHMS496310-supplement-Supp_Figure_S1-S3.pdf]
